# Supplementary material for: Identification and analysis of lipid metabolism-related genes in allergic rhinitis
Source: Research Square preprint supplement (doi:10.21203/rs.3.rs-2461941/v1), 2023-01-12
Supplement: Supplementary file [file 5a75ab06757804a18fe1a170.pdf]

This document certifies that the manuscript  
Identification and analysis of lipid metabolism-related genes in allergic rhinitis

prepared by the authors

Qilei Tao, Yajing Zhu, Tianyu Wang, Yue Deng, Huanhai Liu, Jian Wu

was edited for proper English language, grammar, punctuation, spelling, and overall style  
by one or more of the highly qualified native English speaking editors at SNAS.

This certificate was issued on **January 5, 2023** and may be verified  
on the [SNAS website](#) using the verification code **4419-343B-E569-4741-A62P**.

Neither the research content nor the authors' intentions were altered in any way during the editing process. Documents receiving this certification should be English-ready for publication; however, the author has the ability to accept or reject our suggestions and changes. To verify the final

SNAS edited version, please visit our verification page at [secure.authorservices.springernature.com/certificate/verify](https://secure.authorservices.springernature.com/certificate/verify).

If you have any questions or concerns about this edited document, please contact SNAS at [support@as.springernature.com](mailto:support@as.springernature.com).
